# Supplementary material
Source: PubMed Central journal article supplement (PMC3001235)
Supplement: supp_jn.110.127597_nut127597_F01.pdf [file supp_jn.110.127597_nut127597_F01.pdf]

Online Supporting Material

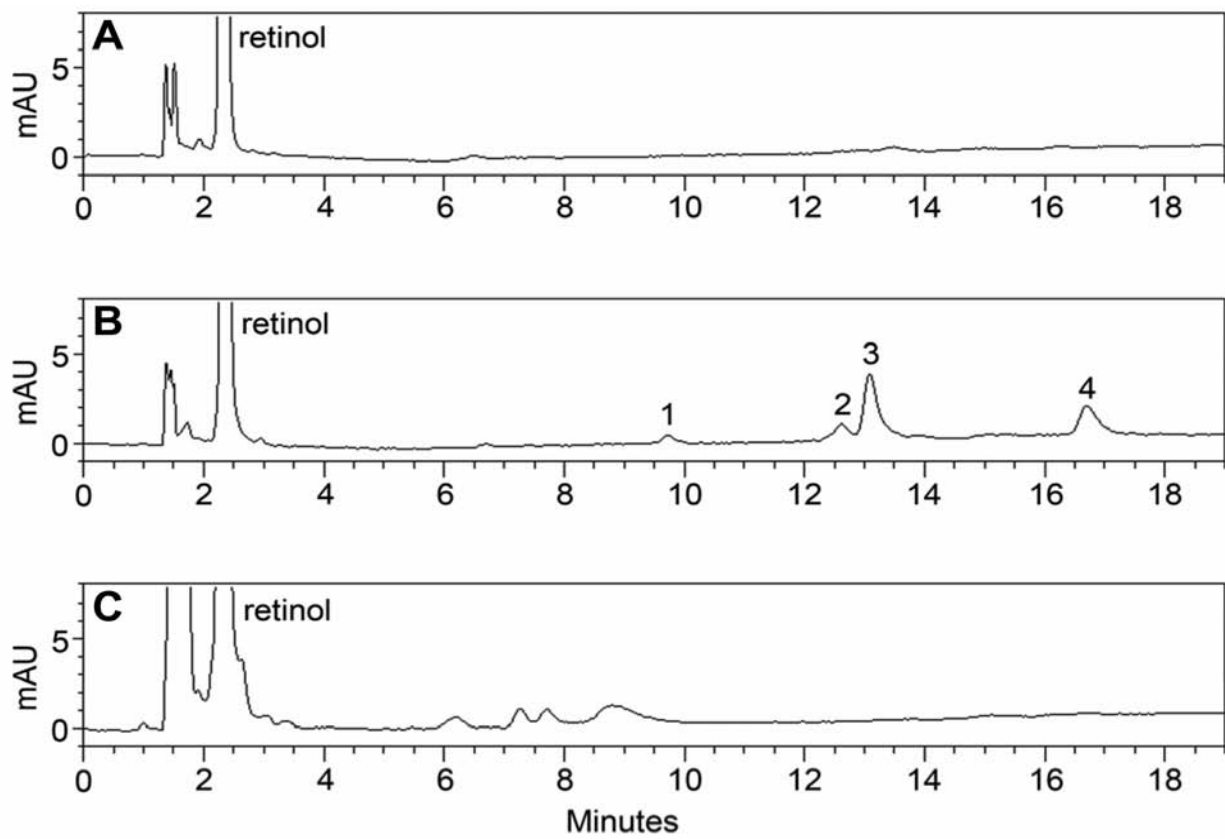

**Supplemental Figure 1.** Chromatograms of pooled baseline sow serum (A), or unsaponified (B) and saponified (C) pooled sow serum 2 h after administration of  $\alpha$ -retinyl acetate (35  $\mu$ mol). Peaks appearing from 5-10 min in the saponified sample could not be identified as retinoids based on their absorption spectra. This HPLC method did not result in separation of  $\alpha$ -retinol from retinol.
